# Supplementary material for: Improvement of Health-Promoting Functionality of Rye Bread by Fortification with Free and Microencapsulated Powders from Amelanchier alnifolia Nutt
Source: PubMed Central journal article supplement (PMC7402143; doi:10.3390/antiox9070614), 2020-07-13
Supplement: antioxidants-09-00614-s001.pdf [file antioxidants-09-00614-s001.pdf]

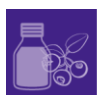

1 **Improvement of health-promoting functionality of**  
 2 **rye bread by fortification with free and**  
 3 **microencapsulated powders from *Amelanchier***  
 4 ***alnifolia* Nutt.**

5 Sabina Lachowicz <sup>1,\*</sup>, Michał Świeca <sup>2</sup> and Ewa Pejcz <sup>1</sup>

6 <sup>1</sup> Department of Fermentation and Cereals Technology, Wrocław University of Environmental and Life  
 7 Science, Chelmońskiego 37 Street, 51-630 Wrocław, Poland; sabina.lachowicz@upwr.edu.pl (S.L.);  
 8 ewa.pejcz@upwr.edu.pl (E.P.);

9 <sup>2</sup> Department of Biochemistry and Food Chemistry, Agricultural University, Skromna 8, 20-704 Lublin,  
 10 Poland; michal.swieca@up.edu.pl (M.Ś.)

11 \* Correspondence: sabina.lachowicz@up.wroc.pl (S.L.).

12 Received: date; Accepted: date; Published: date

13

14

15

**Table S1.** The content of phenolic compounds in pure fruit powder, encapsulated fruit powders with maltodextrin, and encapsulated fruit powders with inulin [mg/100 g d.s.]

| Class of polyphenols | Compounds  | FPI                    | FPM       | FP          |
|----------------------|------------|------------------------|-----------|-------------|
| Flavanols            | K-3-gal    | 42.4±0.8b <sup>2</sup> | 50.2±1.0a | 19.2±0.4c   |
|                      | Q-3-ara    | 3.3±0.1a               | 3.6±0.1a  | 1.0±0.01b   |
|                      | K-3-glu    | 2.2±0.1a               | 2.1±0.1a  | 0.0±0.0b    |
|                      | Q          | 0.2±0.1a               | 0.1±0.1a  | 0.0±0.0a    |
|                      | Q-3-rut    | 43.2±0.9b              | 46.9±0.9a | 27.9±0.6c   |
|                      | Q-3-rob    | 0.2±0.01b              | 0.3±0.01b | 1.9±0.01a   |
|                      | Q-3-gal    | 201±4b                 | 225±4a    | 151±3c      |
|                      | Q-3-glu    | 9.9±0.2c               | 11.0±0.2b | 19.2±0.4a   |
|                      | Q-3-ara    | 3.6±0.1c               | 5.5±0.1b  | 6.7±0.1a    |
|                      | Q-3-xyl    | 1.8±0.1b               | 1.9±0.1b  | 7.7±0.2a    |
|                      | Q-3-6gal   | 2.0±0.1b               | 2.0±0.1b  | 6.7±0.1a    |
|                      | Q-3-6glu   | 6.3±0.1b               | 7.7±0.2a  | 2.9±0.1c    |
|                      | Qdhe       | 5.2±0.1c               | 7.7±0.2a  | 6.7±0.1b    |
|                      | SUM        | 322±55b                | 364±61a   | 251±40c     |
| Phenolic acids       | PrA        | 6.9±0.1b               | 9.9±0.2a  | 1.9±0.1c    |
|                      | CH         | 6.6±0.1a               | 5.7±0.1a  | 0.0±0.0b    |
|                      | ThA        | 22.3±0.4a              | 23.8±0.5a | 24.4±0.5a   |
|                      | 3CQA       | 319±6b                 | 326±6a    | 239±4c      |
|                      | Cag        | 71.4±1.4a              | 66.9±1.3b | 64.4±1.3c   |
|                      | 5CQA       | 816±16a                | 786±15c   | 791.3±15.8b |
|                      | 4CQA       | 200±4a                 | 197±4b    | 170±3c      |
|                      | 3pCQA      | 55.8±1.1a              | 19.7±0.4c | 21.2±0.4b   |
|                      | trans-4CQA | 0.0±0.0c               | 0.0±0.0b  | 12.5±0.3a   |
|                      | DCQA       | 9.0±0.2a               | 7.6±0.2b  | 0.0±0.0c    |
| DCQA                 | 3.4±0.1a   | 2.8±0.1b               | 0.0±0.0c  |             |

|                                          |                          |           |           |           |           |
|------------------------------------------|--------------------------|-----------|-----------|-----------|-----------|
|                                          | SUM                      | 1511±246a | 1447±240b | 1325±236c |           |
| Anthocyanins                             | C-3-hexepi               | 0.0±0.0b  | 0.0±0.0b  | 8.2±0.2a  |           |
|                                          | C-3-pentepi              | 0.0±0.0b  | 0.0±0.0b  | 3.8±0.1a  |           |
|                                          | C-3-hexepicat            | 0.0±0.0b  | 0.0±0.0b  | 6.7±0.1a  |           |
|                                          | C-3-O-gal                | 1651±33a  | 1501±30b  | 1230±24c  |           |
|                                          | C-3-O-glu                | 443±8a    | 423±8b    | 272±5c    |           |
|                                          | C-3-O-ara                | 106±2a    | 64.1±1.3c | 70.2±1.4b |           |
|                                          | C-3-O-xyl                | 159±3a    | 120±2b    | 109±2c    |           |
|                                          | C                        | 2.7±0.1a  | 2.0±0.1b  | 0.0±0.0c  |           |
|                                          | SUM                      | 2363±568a | 2111±520b | 1701±421c |           |
| Flavan-3-ols                             | PB4                      | 228±4a    | 204±4b    | 0.0±0.0c  |           |
|                                          | PB4                      | 7.4±0.1a  | 4.6±0.1b  | 0.0±0.0c  |           |
|                                          | PA2                      | 79.5±1.6b | 67.8±1.4c | 100±2a    |           |
|                                          | PB2                      | 47.6±1c   | 51.1±1.0b | 92.3±1.8a |           |
|                                          | Cat                      | 30.4±0.6a | 23.8±0.5b | 23.1±0.5b |           |
|                                          | PB3                      | 40.8±0.8b | 55.9±1.1a | 55.8±1.1a |           |
|                                          | Epi                      | 4.2±0.1c  | 5.4±0.1b  | 10.6±0.2a |           |
|                                          | PB4                      | 33.0±0.7c | 56.4±1.1a | 43.3±0.9b |           |
|                                          | PB4                      | 4.8±0.1a  | 4.7±0.1a  | 2.1±0.1b  |           |
|                                          | PB3                      | 15.8±0.3  | 15.9±0.3  | 25.8±0.5  |           |
|                                          | PB3                      | 6.3±0.1a  | 5.7±0.1b  | 4.8±0.1c  |           |
|                                          | PB4                      | 29.3±0.6a | 29.7±0.6a | 6.7±0.1b  |           |
|                                          | PB4                      | 47.2±0.9a | 44.2±0.9b | 0.0±0.0c  |           |
|                                          |                          | SUM       | 574±59a   | 569±53b   | 364±35c   |
|                                          | Total phenolic compounds |           | 4772±933a | 4492±809b | 3642±714c |
| Antioxidant activity<br>[µmol TE/g d.s.] | FRAP                     | 33.1±0.7b | 38.0±0.8a | 18.0±0.4c |           |
|                                          | ABTS                     | 50.0±1.0a | 49.5±1.0a | 30.1±0.6b |           |

<sup>1</sup> Values are expressed as the mean (n = 3) ± standard deviation. Mean values bearing different letters in the same row denote statistical difference (a>b>c...etc).

Epi, (-)-epicatechin; Cat, (+)-catechin; PB4, B-type procyanidin tetramer; PB3, B-type procyanidin trimer; PB2, B-type procyanidin dimer; PA2, A-type procyanidin dimer; C-3-gal, cyanidin-3-O-galactoside; C-3-glu, cyanidin-3-O-glucoside; C-3-ara, cyanidin-3-O-arabinoside; C-3-xyl, cyanidin-3-O-xyloside; C, cyaniding; PrA, protocatechuic acid; Cag, caffeic acid glucoside; Chx, caffeoylhexose; ThA, trihydroxycinnamoylquinic acid isomers; 3CQA, 3-O-caffeoylquinic acid; 5CQA, 5-O-caffeoylquinic acid; 4CQA, 4-O-caffeoylquinic acid; 3pCQA, 3-O-p-coumaroylquinic acid; DCQA, di-caffeoylquinic acid; DCQA, di-caffeoylquinic acid; Q, quercetin; Q-3-rob, quercetin-3-O-robinobioside; Q-3-rut, quercetin-3-O-rutinoside; Q-3-ara, quercetin-3-O-arabinoside; Q-3-xyl, quercetin-3-O-xyloside; Q-3-glu, quercetin-3-O-glucoside; Q-3-gal, quercetin-3-O-galactoside; Q-3-arab, quercetin-3-O-arabinobioside; Q-3-6glu, quercetin-3-O-(6"-acetyl)glucoside; Q-3-6gal, quercetin-3-O-(6"-acetyl)galactoside; Qdhe, quercetin-deoxyhexo-heksoside; K-3-gal, kaempferol-3-O-galactoside; K-3-glu, kaempferol-3-O-glucoside; C-3-hexepi, C-3-hexoside-(epi)catechin; C-3-pentepi, C-3-pentoside-(epi)catechin; C-3-hexepicat, C-3-hexoside-(epi)cat-(epi)cat.

© 2020 by the authors. Submitted for possible open access publication under the terms and conditions of the Creative Commons Attribution (CC BY) license (<http://creativecommons.org/licenses/by/4.0/>).

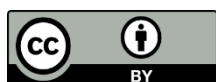

16  
17  
18  
19  
20  
21  
22  
23  
24  
25  
26  
27  
28  
29  
30  
31

32
